# Supplementary material for: Sumoylation of CCAAT/enhancer-binding protein α is implicated in hematopoietic stem/progenitor cell development through regulating runx1 in zebrafish
Source: PubMed Central journal article supplement (PMC4355724; doi:10.1038/srep09011), 2015-03-11
Supplement: srep09011-s1.pdf [file srep09011-s1.pdf]

**Sumoylation of CCAAT/enhancer-binding protein  $\alpha$  is implicated in  
hematopoietic stem/progenitor cell development through regulating *runx1* in zebrafish**

Hao Yuan<sup>1</sup>, Tao Zhang<sup>1</sup>, Xiaohui Liu<sup>1</sup>, Min Deng<sup>2</sup>, Wenqing Zhang<sup>3</sup>, Zilong Wen<sup>4</sup>, Saijuan Chen<sup>1</sup>,  
Zhu Chen<sup>1</sup>, Hugues de The<sup>1,5</sup>, Jun Zhou<sup>1,\*</sup> and Jun Zhu<sup>1,5,\*</sup>

**Supplementary Figure Legends**

**Figure S1. HSPCs are reduced in SUMO-deficient embryos.** (A) WISH assay of *runx1* at 30 hpf. Boxed regions indicate the AGM. Blue arrows identify *runx1*-positive cells in the AGM. (B) Fluorescent images of the Tg (*cmyb*-EGFP) line at 72 hpf. Boxed regions indicate the CHT. White arrows identify *cmyb*-positive cells in the CHT. (C) Quantification of *cmyb*-EGFP positive cells in the CHT region of Tg (*cmyb*-EGFP) line at 72 hpf. Data shown are the mean  $\pm$  SD,  $n \geq 3$ , \* $P < 0.01$  by student's *t*-test. (D) WISH assay of *cmyb* in the *p53* mutant embryos at 72 hpf.

**Figure S2. Apoptosis of HSPC is not affected in SUMO-deficient embryos.** (A-I) Double immunostaining of *cmyb*-EGFP (A-C) and TUNEL (D-F) in the CHT of Tg (*cmyb*-EGFP) line at 72 hpf. The bottom panel shows merged images (G-I). (J) Quantification of TUNEL and *cmyb*-EGFP double positive cells in the CHT of Tg (*cmyb*-EGFP) line at 72 hpf. Data shown are the mean  $\pm$  SD,  $n \geq 5$ , P values stand for student's *t*-test.

**Figure S3. WISH and Luciferase activity assays.** (A) WISH assay of *runx1* at 36 hpf.

Overexpression of *SUMO-cebpa* could rescue the HSPC defects of SUMOs morphant. Blue arrows identify *runx1*-positive cells in the AGM. (B) Luciferase activity assays were performed in 293T cells using various *C/ebpα* constructs indicated. The Renilla plasmid was used as an internal control. Note that *SUMO-C/ebpα ΔBR* lost the repressive effect on the transcriptional activity of WT *C/ebpα*. (C) WISH assay of *cmyb* at 72 hpf. Overexpression of *SUMO-cebpa*, *POZ-cebpa* or *SUMO-cebpa ΔBR* alone had no obvious effect on HSPC development.

**Figure S4. Targeted disruption of *cebpa* gene with TALENs in zebrafish.** (A) Partial structure and sequence of the *cebpa* gene, showing the target sites (underlined) of the left and right TALENs. The *Sal* I site used for detecting mutations is highlighted in red. (B) Sequencing results of *cebpa* mutation induced by TALENs in F1 fish line. The TALENs binding sites are underlined. Deletions are indicated by dashes. (C) Sudan black staining of embryos from incross of heterozygous *cebpa* mutants at 72 hpf. Red arrows indicated Sudan black positive cells in the CHT. (D) Genotyping of the corresponding embryos in (C) by genomic PCR amplification and *Sal* I digestion.

**Figure S1.**

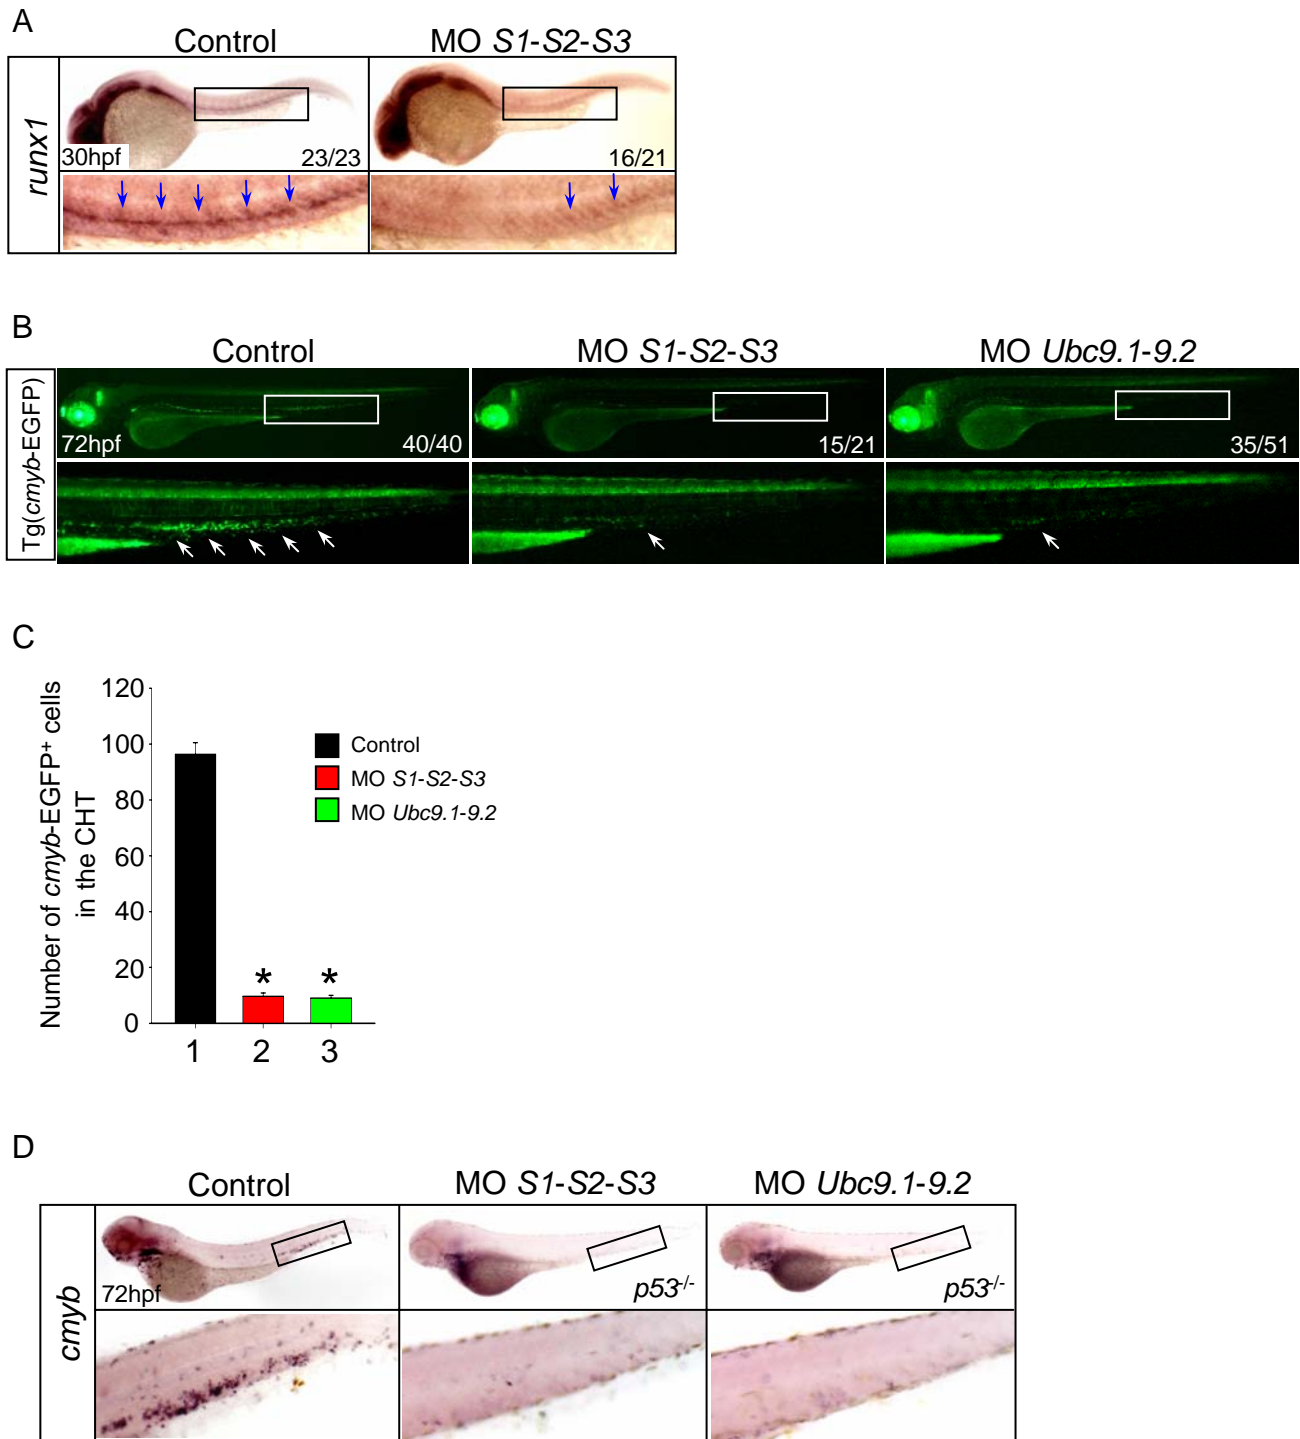

Figure S2.

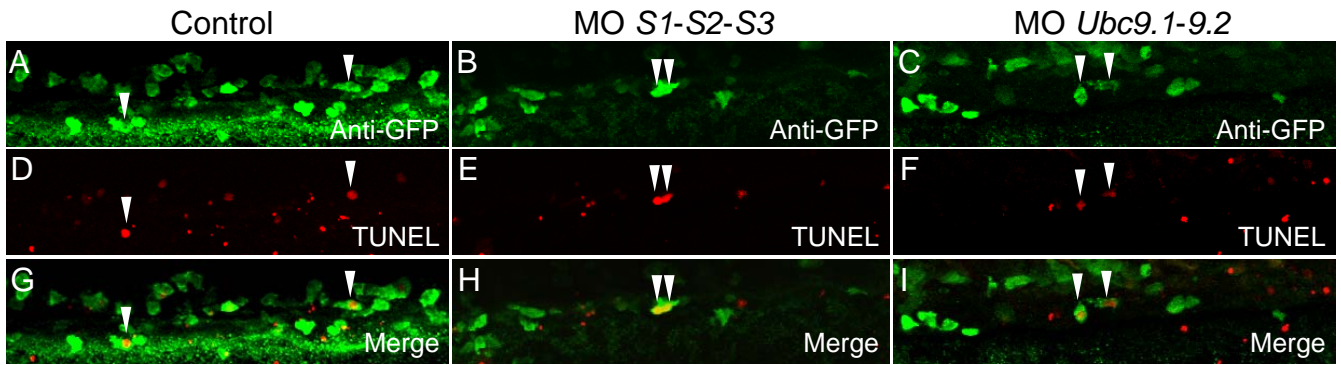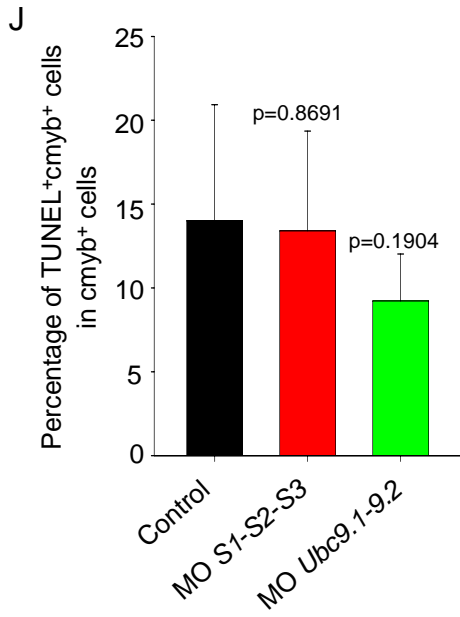

**Figure S3.**

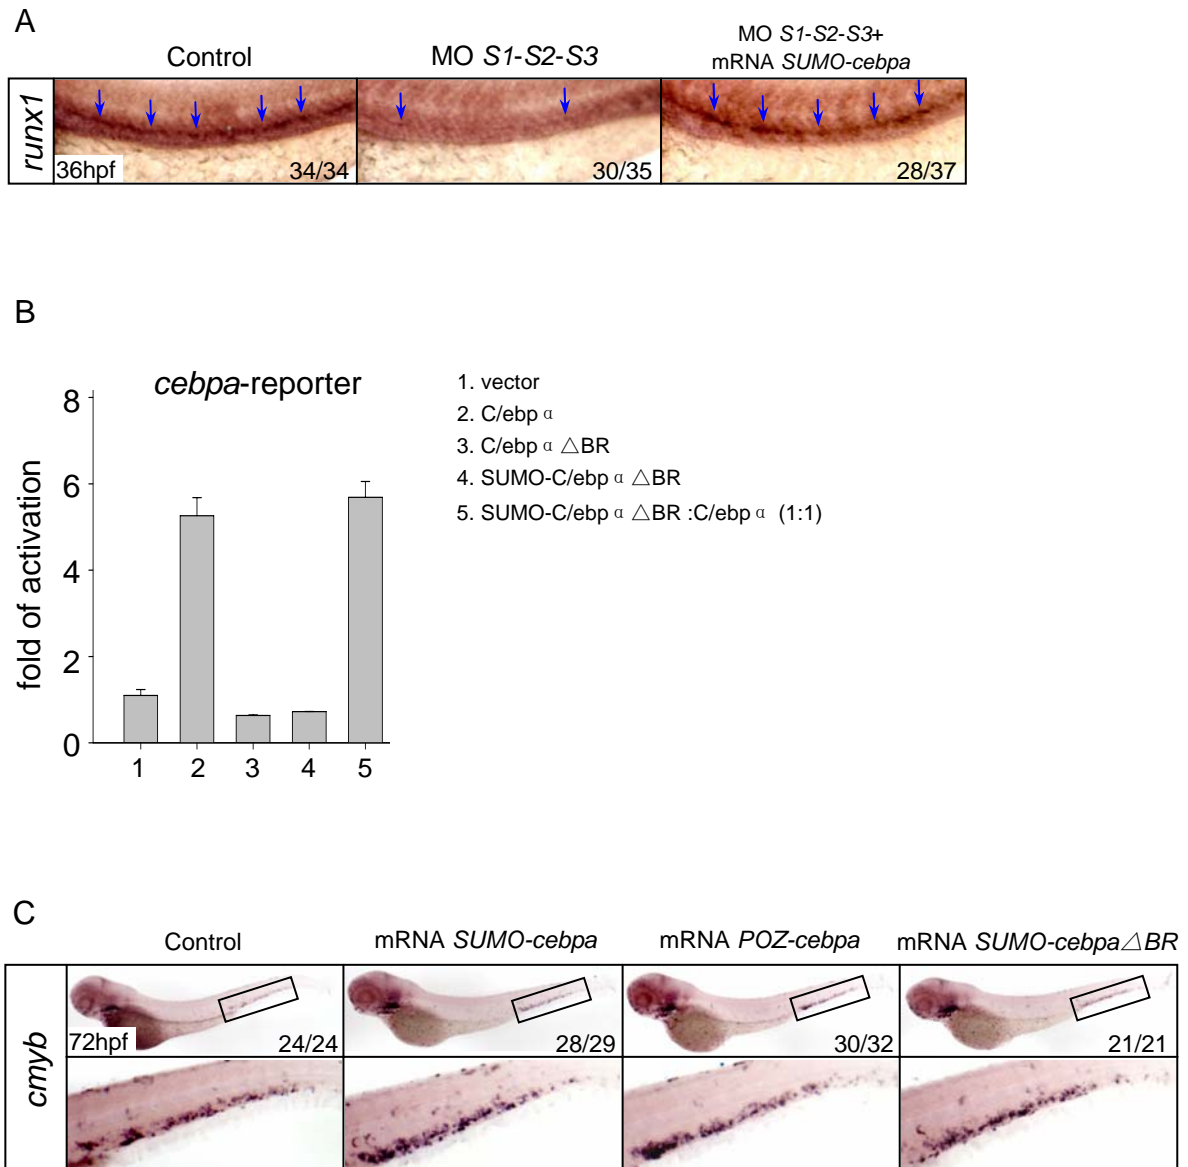

**Figure S4.**

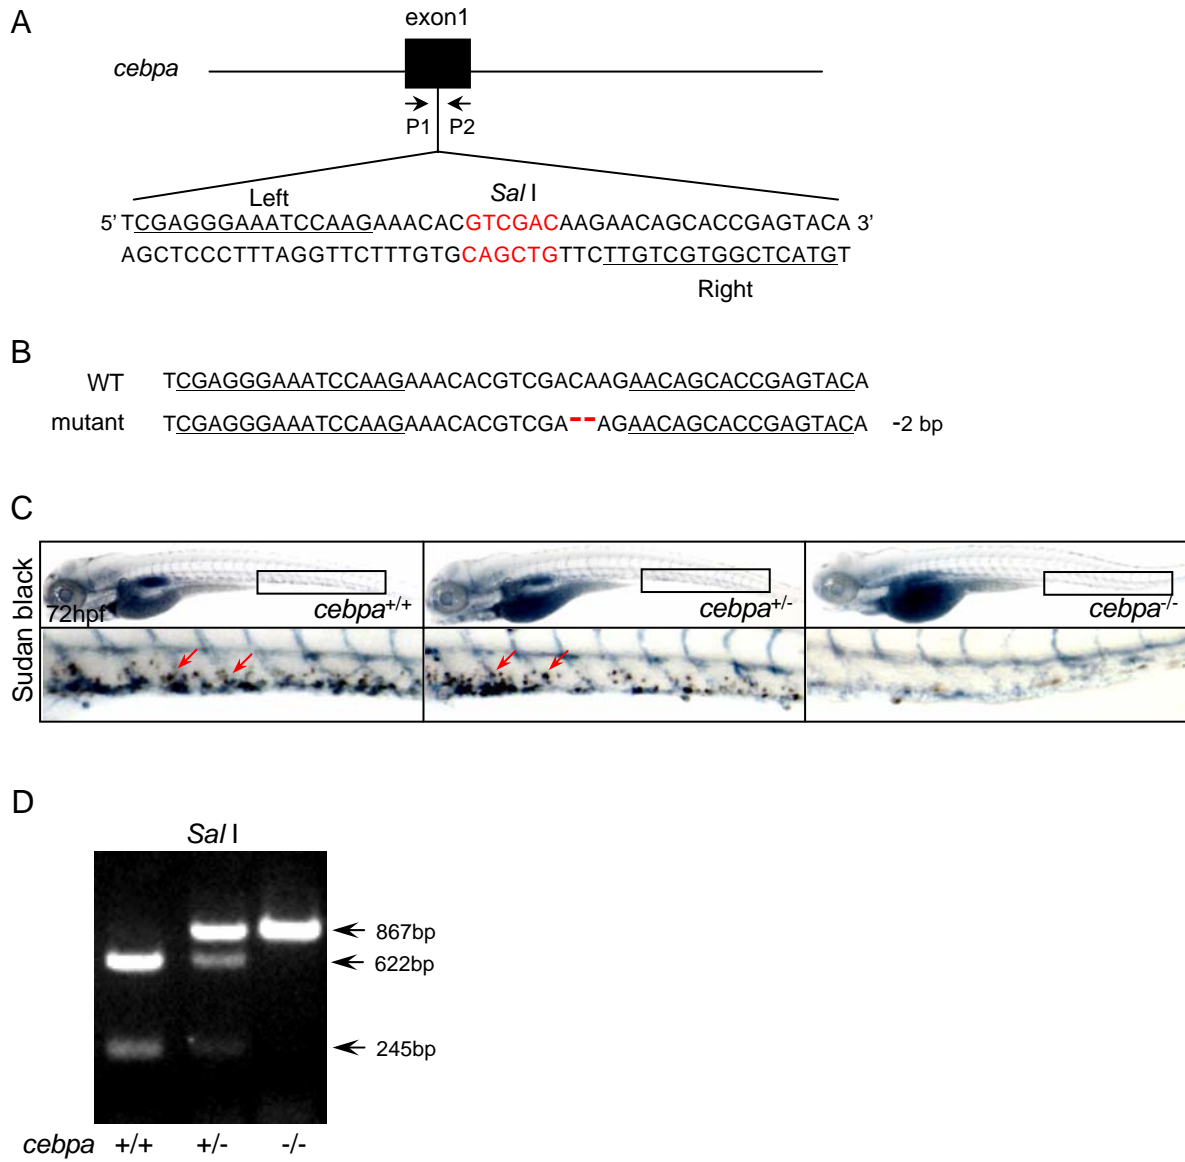

Table S1. Primer sequences

| Primer name                     | Primer sequence |                                                         |
|---------------------------------|-----------------|---------------------------------------------------------|
| mouse <i>Runx1</i> enhancer     | Forward         | GAGGATCCGGGGTGGGAGGTGTAAGTTC                            |
|                                 | Reverse         | GAGTCGACCAGGTGTCAGCAACCCAT                              |
| <i>runx1</i>                    | Forward         | CCGGAATTCATGGACTACAAGGACGACGATGACAAAGTTTTCTTTGGGACGCCAA |
|                                 | Reverse         | CCGCTCGAGGCTGTCAGTATGGCCTCCAG                           |
| <i>C/ebpa</i> $\Delta$ BR       | Forward         | GGAGCGCAACAACATAGCCGTGAATGTGGAGACGCAACAAAAAG            |
|                                 | Reverse         | CTTTTGTGCGTCTCCACATTCACGGCTATGTTGTTGCGCTCC              |
| <i>SUMO2-C/ebpa</i> $\Delta$ BR | Forward         | GGAGCGCAACAACATAGCCGTGAATGTGGAGACGCAACAAAAAG            |
|                                 | Reverse         | CTTTTGTGCGTCTCCACATTCACGGCTATGTTGTTGCGCTCC              |
| <i>cebpa</i>                    | Forward         | ATGGAGCAAGCAAACCTCTACGAGG                               |
|                                 | Reverse         | TTAAGCGCAGTTGCCCATGGCTTTG                               |
| <i>bactin</i>                   | Forward         | GATCTTCACTCCCCTTGTTCA                                   |
|                                 | Reverse         | GGCAGCGATTCCTCATC                                       |
